# Supplementary material for: Analysis of Polycyclic Aromatic Hydrocarbons Using Magnetic Three-Dimensional Graphene Solid-Phase Extraction Coupled with Gas Chromatography–Mass Spectrometry
Source: MDPI journal article supplement (doi:10.3390/separations10110564), 2023-11-10
Supplement: s1 [file s1]

## **SUPPORTING INFORMATION**

### **Magnetic three-dimensional graphene skeleton as a fast mass transport network for solid-phase extraction of polycyclic aromatic hydrocarbons coupled to gas chromatography-mass spectrometry selected ion monitoring**

Hassan Sereshti 1, Mahsa Karimi 1, Sajad Karami 2, Shokouh Mahpishanian 1, Mehdi Esmaeili Bidhendi 3, Shahabaldin Rezaia 4,\*, Amin Mojiri 5, Hesam Kamyab 6 and Hamid Rashidi Nodeh 1

<sup>1</sup>School of Chemistry, College of Science, University of Tehran, Tehran, Iran. Emails: sereshti@ut.ac.ir; sh.mahpishanian@gmail.com; rnhamid2@gmail.com

<sup>2</sup>Department of Nutrition, Dietetics and Food Sciences, Utah State University, Logan, Utah 84322, United States. Email: sajad.karami@usu.edu

<sup>3</sup>School of Environment, College of Engineering, University of Tehran, Tehran, Iran. Email: esmaeilib@ut.ac.ir

<sup>4</sup>Department of Environment and Energy, Sejong University, Seoul 05006, South Korea. Email: sha-hab.rezania@sejong.ac.kr

<sup>5</sup>Department of Civil and Environmental Engineering, Graduate School of Advanced Science and Technology, Higashihiroshima, 739-8725, Japan. Email: amin.mojiri@gmail.com

<sup>6</sup>Malaysia-Japan International Institute of Technology (MJIT), Universiti Teknologi Malaysia, Jalan Sultan Yahya Petra, 54100 Kuala Lumpur, Malaysia. Email: hesam\_kamyab@yahoo.com

\* Correspondence: shahab.rezania@sejong.ac.kr

**Table S1.** The main parameters, their symbols and levels in the central composite design.

| Parameter                  | Symbol | Levels      |     |                |    |             |
|----------------------------|--------|-------------|-----|----------------|----|-------------|
|                            |        | $-\alpha^a$ | -1  | 0 <sup>b</sup> | +1 | $+\alpha^a$ |
| Adsorbent dosage (mg)      | A      | 5           | 10  | 17.5           | 25 | 30          |
| Extraction time (min)      | T      | 1           | 4.8 | 10.5           | 16 | 20          |
| Salt concentration (% w/v) | S      | 0           | 3   | 7.5            | 12 | 15          |

<sup>a</sup> Axial points with  $\pm 1.682$  unit from the center. <sup>b</sup> Center point.

**Table S2.** Design matrix for the central composite design.

| Run # | Block # | A <sup>a</sup> | S <sup>b</sup> | T <sup>c</sup> | Response <sup>d</sup> |
|-------|---------|----------------|----------------|----------------|-----------------------|
| 1     | 1       | 17             | 7.5            | 10.5           | 4965                  |
| 2     | 1       | 10             | 3.0            | 4.9            | 5037                  |
| 3     | 1       | 25             | 3.0            | 16.2           | 4971                  |
| 4     | 1       | 10             | 12.0           | 16.2           | 5142                  |
| 5     | 1       | 17             | 7.5            | 10.5           | 4241                  |

|    |   |    |      |      |      |
|----|---|----|------|------|------|
| 6  | 1 | 25 | 12.0 | 4.9  | 2976 |
| 7  | 2 | 25 | 12.0 | 16.2 | 3947 |
| 8  | 2 | 10 | 3.0  | 16.2 | 4331 |
| 9  | 2 | 10 | 12.0 | 4.9  | 4591 |
| 10 | 2 | 25 | 3.0  | 4.9  | 5326 |
| 11 | 2 | 17 | 7.5  | 10.5 | 4799 |
| 12 | 2 | 17 | 7.5  | 10.5 | 5542 |
| 13 | 3 | 17 | 7.5  | 10.5 | 5178 |
| 14 | 3 | 17 | 7.5  | 10.5 | 5173 |
| 15 | 3 | 17 | 7.5  | 1.0  | 4789 |
| 16 | 3 | 17 | 15.0 | 10.5 | 4879 |
| 17 | 3 | 17 | 7.5  | 10.5 | 4844 |
| 18 | 3 | 30 | 7.5  | 10.5 | 3350 |
| 19 | 3 | 5  | 7.5  | 10.5 | 4998 |
| 20 | 3 | 17 | 7.5  | 10.5 | 5289 |
| 21 | 3 | 17 | 7.5  | 20.0 | 4727 |
| 22 | 3 | 17 | 0.0  | 10.5 | 4499 |
| 23 | 3 | 17 | 7.5  | 10.5 | 5633 |

<sup>a</sup> Adsorbent (mg). <sup>b</sup> Salt concentration (w/v, %). <sup>c</sup> Extraction time (min). <sup>d</sup> Total chromatographic peak area.

**Table S3.** Analysis of variance (ANOVA) for the central composite design.

| Source | Sum of Squares <sup>a</sup> | d.f. <sup>b</sup> | Mean Square <sup>c</sup> | F value <sup>d</sup> | p-value <sup>e</sup> | Significance |
|--------|-----------------------------|-------------------|--------------------------|----------------------|----------------------|--------------|
| Block  | 3.09×10 <sup>5</sup>        | 2                 | 1.55×10 <sup>5</sup>     |                      |                      |              |
| Model  | 7.80×10 <sup>6</sup>        | 7                 | 1.11×10 <sup>6</sup>     | 41.45                | < 0.0001             | Significant  |
| A      | 2.19×10 <sup>6</sup>        | 1                 | 2.19×10 <sup>6</sup>     | 81.32                | < 0.0001             | Significant  |
| S      | 5.88×10 <sup>5</sup>        | 1                 | 5.88×10 <sup>5</sup>     | 21.87                | 0.0004               |              |
| T      | 7.51×10 <sup>3</sup>        | 1                 | 7.51×10 <sup>3</sup>     | 0.27                 | 0.606                |              |

|                              |                    |    |                    |       |          |                 |
|------------------------------|--------------------|----|--------------------|-------|----------|-----------------|
| AS                           | $1.71 \times 10^6$ | 1  | $1.71 \times 10^6$ | 63.72 | < 0.0001 | Significant     |
| ST                           | $1.44 \times 10^6$ | 1  | $1.44 \times 10^6$ | 53.61 | < 0.0001 | Significant     |
| A <sup>2</sup>               | $1.66 \times 10^6$ | 1  | $1.66 \times 10^6$ | 61.82 | < 0.0001 | Significant     |
| C <sup>2</sup>               | $2.21 \times 10^5$ | 1  | $2.21 \times 10^5$ | 8.20  | 0.0133   |                 |
| Residual <sup>f</sup>        | $3.49 \times 10^5$ | 13 | $2.69 \times 10^4$ |       |          |                 |
| Lack of Fit <sup>g</sup>     | $2.10 \times 10^5$ | 7  | $3.00 \times 10^4$ | 1.29  | 0.385    | not significant |
| Pure Error <sup>h</sup>      | $1.39 \times 10^5$ | 6  | $2.32 \times 10^4$ |       |          |                 |
| Corrected Total <sup>i</sup> | $8.46 \times 10^6$ | 22 |                    |       |          |                 |

---

<sup>a</sup> Sum of the squared differences between the average values and the overall mean. <sup>b</sup> Degrees of freedom. <sup>c</sup> Sum of squares divided by d.f. <sup>d</sup> Test for comparing term variance with residual (error) variance. <sup>e</sup> Probability of seeing the observed F-value if the null hypothesis is true. <sup>f</sup> Consists of terms used to estimate experimental error. <sup>g</sup> Variation of the data around the fitted model. <sup>h</sup> Variation in the response in replicated design points. <sup>i</sup> Totals of all information corrected for the mean.
